1 **Waves out of the Korean Peninsula and inter- and intra-species**  
2 **replacements in freshwater fishes in Japan**

3  
4

5 Shoji Taniguchi,<sup>a</sup> Johanna Bertl,<sup>b</sup> Andreas Futschik,<sup>c</sup>  
6 Hirohisa Kishino,<sup>a</sup> and Toshio Okazaki<sup>a\*</sup>

7

8 <sup>a</sup>Graduate School of Agricultural and Life Sciences, The University of Tokyo, 1-1-1, Yayoi,  
9 Bunkyo-ku, Tokyo, 113-8657, Japan

10 <sup>b</sup>Department of Mathematics, Aarhus University, Ny Munkegade 118, bldg. 1530, 8000  
11 Aarhus C, Denmark

12 <sup>c</sup>Department of Applied Statistics, Johannes Kepler University Linz, Altenberger Str. 69, 4040  
13 Linz, Austria

14

15 \*Corresponding author

16 E-mail address: okazakit@ut-biomet.org (Toshio Okazaki)

17

18 Funding information

19 This study was supported by Grants-in-Aid for Scientific Research (B) 16H02788 and  
20 19H04070 from the Japan Society for the Promotion of Science.

21

22 **Abstract**

23 The Japanese archipelago is located at the periphery of the continent of Asia. Rivers in the  
24 Japanese archipelago, separated from the continent of Asia about 17 Ma, have experienced an  
25 intermittent exchange of freshwater fish taxa through a narrow land bridge generated by  
26 lowered sea level. As the Korean Peninsula and Japanese archipelago were not covered by an  
27 ice sheet during glacial periods, phylogeographical analyses in this region can trace the  
28 history of biota for a long time beyond the last glacial maximum. In this study, we analyzed  
29 the phylogeography of four freshwater fish taxa, *Hemibarbus longirostris*, dark chub  
30 *Nipponocypris temminckii*, *Tanakia* ssp. and *Carassius* ssp., whose distributions include both  
31 the Korean Peninsula and western Japan. We found for each taxon that a small component of  
32 diverse Korean clades of freshwater fishes migrated in waves into the Japanese archipelago to  
33 form the current phylogeographic structure of biota. Indigenous populations were replaced by  
34 succeeding migrants. We refer to this phenomenon as “waves out of the Korean Peninsula,”  
35 with parallels to “out of Africa” in humans.

36

37 **Keywords**

38 Competitive exclusion, East Asia, freshwater fish, intra-species replacement, island model,  
39 migration

40

## 41 1. INTRODUCTION

42 Inter- and intra-species interactions can influence biogeographical distributions (Pearson and  
43 Dawson, 2003; Waters, 2011; Wisz et al. 2013). Among many forms of biotic interactions,  
44 replacement among competing species that are mutually exclusive is presumed to be an  
45 important factor in biogeography (Gutiérrez et al., 2014; Yackulic, 2017). For humans,  
46 cultural records and genomic information have revealed a history of complex waves of  
47 dispersal and admixture out of Africa (Hellenthal et al., 2014; Nielsen et al., 2017).

48  
49 While evidence for segregation is identified as genetic differentiation between geographical  
50 regions, phylogeographic evidence of intra-species replacements due to competition has not  
51 been extensively examined. Most evidence supporting the existence of species replacement is  
52 found in the spatial division and isolation of species, where the distributions of one species  
53 are surrounded by those of another (Gutiérrez et al., 2014). This contrasts with conventionally  
54 observed fragmentation, where populations are both genetically and spatially isolated from  
55 each other. Because fragmented populations are small, they have large genetic variation. They  
56 do not comprise a monophyletic group in phylogeny, but are interspersed by the main  
57 population. Conversely, local populations that have been recently divided by competitors of a  
58 different clade are genetically homogeneous and comprise a monophyletic group (Figure 1).

59  
60 Gene flow among freshwater fishes is extremely low, as salinity barriers separate neighboring  
61 rivers. Dispersal within freshwater systems is prevalent, while dispersal between them is rare,  
62 with watersheds and oceans representing migration barriers. Between-system dispersal can  
63 occur by floods in lower basins, stream capture, or the appearance of a larger freshwater  
64 system that connects rivers in periods of decreased sea level during glacial periods. Limited  
65 genetic exchange between rivers lowers rates of species replacement. In the Quaternary, the  
66 distribution of biota was influenced by ice-sheets (Shafer et al., 2010). In northern hemisphere  
67 mid-latitudes such as throughout Europe or North America it is difficult to trace  
68 biogeographic history beyond the most recent ice-sheet formation of about 10 Ka. However,  
69 the Japanese archipelago and Korean Peninsula were never covered by ice sheets during  
70 glacial periods (Flint, 1971). Therefore, many taxa suitable for appraising the effects of  
71 competition on the distributions of genetic clades might exist in this region.

72  
73 The Japanese archipelago is located at the periphery of the continent of Asia. The archipelago  
74 landmass originally formed the eastern margin of the continent of Asia. After the back-arc of  
75 the archipelago opened about 17 Ma, the northeastern half rotated counter-clockwise, while  
76 the southwestern half rotated clockwise. The current position was reached about 14 Ma (Baba  
77 et al., 2007), and fused into the current Japanese archipelago about 6 Ma. The boundary  
78 between these northeastern and southwestern masses is called the Fossa Magna (Figure 2a).  
79 The Japanese archipelago is elongated in a bow along a north–southwest axis. The mountains  
80 extending along this archipelago generate numerous short rivers that discharge separately into  
81 the ocean. The Sea of Japan is deep and has isolated the islands from the continent of Asia,  
82 except for narrow bridges at either end during periods of lowered sea level. These access  
83 points provide potential routes for genetic exchange of freshwater fishes on the Korean  
84 Peninsula with those on the Japanese archipelago. In the Japanese archipelago, the bottom of  
85 the Inland Sea was above sea level in glacial periods, and paleo-river systems connecting  
86 surrounding rivers (Figure 2b) enabled gene flow (Watanabe et al., 2017). Therefore, the  
87 current Inland Sea probably represented a likely dispersal route. Eastern dispersal was  
88 blocked after the uplift of Suzuka and Nunobiki Mountains at about 1 to 1.5 Ma.

89  
90 A key factor in the establishment of the freshwater fish fauna of Japan is the isolation of these

91 islands and their rivers, which affected the rates of expansion of migrant faunas. Here, we  
92 examine the effects of the migration and intra- and inter-species replacements on the  
93 phylogeographic structure in Japan. For this purpose, we analyze the phylogeography of four  
94 freshwater fish taxa, *Hemibarbus longirostris* (Regan, 1908), dark chub *Nipponocypris*  
95 *temminckii* (Temminck & Schlegel, 1846), *Tanakia* ssp. and *Carassius* ssp., whose  
96 distribution includes the Korean Peninsula and western Japan. The first three taxa have never  
97 been the target of commercial fisheries. Phylogenetic analysis combined with the  
98 geographical distributions of clades reveals that migrants from the Korean Peninsula have  
99 replaced indigenous populations in Japan. A simulation-based Bayesian analysis of *N.*  
100 *temminckii* reveals the former dominated the latter significantly.

101  
102 For humans, it has been reported that series of waves of man originated in Africa and  
103 propagated around the world. When these waves interacted with pre-existing populations,  
104 hybridizations and sometimes replacements occurred along the way in a phenomenon known  
105 as “out of Africa.” In East Asia, a component of diverse populations of freshwater fishes in  
106 Korea migrated in waves into the Japanese archipelago; intra- and inter-specific competition  
107 between these new migrants and pre-existing populations then resulted in the current  
108 phylogeographic structure of Japanese freshwater fish biota.

109  
110

## 111 2. Materials and Methods

### 112 2.1. Sampling and sequencing

113 Over 30 years, Toshio Okazaki (T.O.) amassed samples of freshwater fish from throughout  
114 Japan and Korea. From each sampling site, representative fishes were collected by various  
115 procedures, such as netting and angling. Fishes were fixed appropriately for molecular  
116 analyses [ETOH or  $-20^{\circ}\text{C}$ ].

117

118 *Hemibarbus longirostris*: samples were collected between 1990 and 2009 in Japan, and  
119 between 1991 and 1994 in South Korea. Among them, 27 individuals from 15 sites in Japan  
120 and 63 individuals from 20 sites in South Korea were subjected to analysis. By conducting  
121 PCR-RFLP analysis with  $15 \times 4$ -base pair recognition restriction enzymes (Appendix A,  
122 supplementary information), individuals were selected for sequencing. At each site, one  
123 individual was selected for sequencing when all individuals from a site had the same banding  
124 pattern. All individuals with different banding patterns were subjected for sequencing. To  
125 extract high resolution phylogeographic information, we chose the rapidly evolving  
126 mitochondrial gene NADH dehydrogenase subunit 2 (ND2) as a molecular marker. As a  
127 result,  $42 \times \text{ND2}$  sequences of 584bp were obtained. We sequenced the same rapidly evolving  
128 ND2 for other freshwater fishes.

129

130 *Nipponocypris temminckii*: samples were collected between 1988 and 2013 in Japan, and  
131 between 1991 and 1994 in South Korea. Among them, 561 individuals from 340 sites in Japan  
132 and 93 individuals from 57 sites in South Korea were subjected to analysis. By conducting  
133 PCR-RFLP analysis with  $13 \times 4$ -base pair recognition restriction enzymes (Appendix A),  
134 individuals were selected for sequencing. At each site, one individual was selected for  
135 sequencing when all individuals from a site had the same banding pattern. Also, when  
136 individuals from many geographically close streams had the same banding pattern,  
137 individuals from equidistant streams were subsampled for sequencing. All individuals with  
138 different banding patterns were subjected for sequencing. As a result, 309 individuals from  
139 248 sites in Japan and 41 individuals from 32 sites in South Korea were sequenced. We

140 sequenced a partial region of ND2, 600 bp. To calculate the rate of ND2 molecular evolution,  
141 cytochrome b sequence data were obtained from 22 samples of individuals from all clades.  
142 Sequencing followed procedures described in Appendix A (supplementary information).

143  
144 Oily bitterling *Tanakia limbata* (Temminck & Schlegel, 1846), *T. koreensis* (Kim & Kim,  
145 1990) and related species: samples were collected between 1989 and 2013 in Japan. Among  
146 them, 97 individuals from 47 sites were subjected to analysis. Samples of *T. koreensis* and  
147 related species were collected between 1991 and 1994 in South Korea. Among them, 17  
148 individuals from 15 sites were subjected to analysis. As for genus *Tanakia*, individuals were  
149 screened for sequencing based on the PCR-RFLP analysis with 15 × 4-base pair recognition  
150 restriction enzymes (Appendix A). As a result, 70 × ND2 sequences of 741bp were obtained.

151  
152 *Carassius auratus* (Linnaeus, 1758), *C. sp.* and Japanese white crucian carp *C. cuvieri*  
153 Temminck & Schlegel, 1846: samples were collected between 1989 and 2007 in Japan, and  
154 between 1991 and 1994 in South Korea. Among them, 274 individuals from 48 sites in Japan,  
155 and 101 individuals from 41 sites in South Korea were subjected to analysis. Three goldfish  
156 that we analyzed have been exploited commercially, unlike *N. temminckii* and *T. limbata*.  
157 Largely because of between-river transplantations, the PCR-RFLP analysis with 10 × 4-base  
158 pair recognition restriction enzymes (supplementary information) did not identify haplotypes  
159 that characterized regions. Therefore, all individuals with different banding patterns were  
160 sequenced. As a result, 154 × ND2 sequences of 600bp were obtained. The obtained  
161 sequences were deposited in DDBJ/ENA/GenBank (accession numbers were LC566827-  
162 LC566870, LC566893- LC567047, LC567225- LC567298 and LC567958-LC568289).

## 163 164 **2.2. Sampling sites and geomorphological information**

165 Precise collection sites were identified by T. O. based on field notes. Bathymetry was  
166 determined from ETOPO1 data (Amante and Eakins, 2009) using R (R Core Team, 2017)  
167 marmap (Pante and Simon-Bouhet, 2013). A shaded-relief map was made from the elevation  
168 chart (Geospatial Information Authority of Japan, 2013), with marine areas assembled using  
169 data from the Hydrographic and Oceanographic Department, Japan Coast Guard. River data  
170 were obtained from the National Land Numerical Information download service (Ministry of  
171 Land, Infrastructure, Transport and Tourism, 2011).

## 172 173 **2.3 Phylogenetic analysis: *H. longirostris***

174 A phylogenetic tree was constructed using the maximum likelihood (ML) method  
175 implemented in MEGA7 (Kumar et al., 2016). We used sequences of *H. mylodon* (Berg,  
176 1907) and barbel steed *H. barbuis* (Pallas, 1776) as outgroups for *H. longirostris*. The  
177 Bayesian Information Criterion (BIC) selected the TN93+I model as the best model of  
178 nucleotide substitution. Bootstrap values of the ML-estimated branches were obtained by  
179 analyzing 1,000 resampled alignment columns. Based on the sequence-based phylogenetic  
180 tree and sample sites, we reconstructed ancestral distributions of species throughout Japan and  
181 Korea using ML (Pagel, 1994). To account for uncertainty in the phylogenetic tree, we  
182 constructed our tree using the Bayesian MCMC method implemented in BEAST 2.4.7  
183 (Bouckaert et al., 2014). We extracted a 10% subsample of the MCMC sample of 9,000 trees  
184 by sampling at regular intervals and used it as an input together with trait data for ML analysis  
185 by BAYESTRAITS V3. We confirmed that the phylogenetic clades of the current *H.*  
186 *longirostris* population in Japan were formed by a migration event from Korea.

## 187 188 **2.4. Phylogenetic analyses: *N. temminckii***

189 The 309 sequences for *N. temminckii* included 109 unique sequences. A phylogenetic tree was  
190 constructed using the maximum likelihood (ML) method implemented in MEGA7 (Kumar et  
191 al., 2016), and the Bayesian method implemented in BEAST 2.4.7 (Bouckaert et al., 2014); *N.*  
192 *sieboldii* (Temminck & Schlegel, 1846) was used as an outgroup. BIC selected the TN93+I  
193 model as the best model of nucleotide substitution. In the Bayesian tree inference, we  
194 assumed TN93+I as the model of nucleotide substitution. The coalescent process model of a  
195 population in equilibrium was adopted as a prior for the tree. As a prior on the rate of  
196 molecular evolution, we assumed the log-transformed values followed an autocorrelated  
197 normal distribution (Drummond et al., 2006). The mean evolutionary rate was obtained by  
198 converting the frequently cited cytochrome b molecular evolutionary rate, 0.76% per site per  
199 MY (Zardoya and Doadrio (1999)), to that of ND2. By comparing the average evolutionary  
200 distance of cytochrome b sequences (0.0627) and corresponding ND2 sequences (0.0513), the  
201 ND2 evolutionary rate was estimated at 0.93%. We estimated divergence times in the  
202 Bayesian framework using the MCMCTREE package implemented in PAML 4.9 (Yang,  
203 2007). Detailed methods are described in Appendix A1.

204

#### 205 **2.4.1 Geographical origin**

206 Based on the sequence-based phylogenetic tree and sample sites, we reconstructed ancestral  
207 distributions of species throughout Japan and Korea by the same method as for *H.*  
208 *longirostris*. We confirmed that the phylogenetic clades of the current *N. temminckii*  
209 population in Japan were formed by multiple migration events from Korea.

210

#### 211 **2.4.2. Simulation-based testing of the intra-species replacements**

212 To test our hypothesis that indigenous populations of fishes were replaced by new migrants,  
213 we simulated the formation process for *N. temminckii*. By contrasting simulated patterns in  
214 the distribution of this species under various competitive scenarios with the observed pattern,  
215 we examined if information contained in sequences and their sites provided evidence for  
216 intra-species replacement. Simulation assumes the timing of migration from Korea, dispersal  
217 rate within the Japanese archipelago, and replacement rate among intra-species clades,  
218 specifies the formation process. By estimating these parameters via approximate Bayesian  
219 computation (ABC; Beaumont et al., 2002), the significance of the biogeographic evidence on  
220 intra-species replacement was tested.

221

222 As summary statistics sensitive to model parameters (Aeschbacher et al., 2012), we extracted  
223 features from the geographical distributions of clades that contained information on the timing  
224 of migration, and dispersal and replacement rates. These Templeton statistics were used in  
225 Nested Clade Phylogeographic Analysis (NCPA; Posada et al., 2006; Templeton et al., 1995)  
226 and spatial autocorrelation (Figure B1). NCPA was designed to associate the haplotype tree  
227 and geography through clade and nested clade distances, and to infer evolutionary history  
228 from population structure (Templeton, 2004). Spatial autocorrelation measures the correlation  
229 between genetic and geological distances and has a small value when a sample includes  
230 individuals that are surrounded by different neighboring clades. For a detailed explanation of  
231 the simulation algorithm, see Appendix A1.

232

#### 233 **2.5. The case of *T. limbata* and *Carassius* and their related species**

234 ML phylogenetic trees and biogeographic maps for *T. limbata*, *Carassius* and their related  
235 species were obtained in a similar fashion to those for *N. temminckii*. BIC selected the  
236 TN93+G+I model as the best model of nucleotide substitution of *T. limbata* and TN93+I for  
237 genus *Carassius* respectively. We used sequences of *T. lanceolate* (Temminck & Schlegel,

238 1846), Tokyo bitterling *T. tanago* (Tanaka, 1909), *Acheilognathus rhombeus* (Temminck &  
239 Schlegel, 1846), and big-scaled redbfin *Tribolodon hakonensis* (Günther, 1877) as outgroups  
240 for *T. limbata*, and *Cyprinus carpio* Linnaeus, 1758 as the outgroup for *Carassius*.

241

## 242 **2.6. Data availability**

243 Sequence data and sampling sites are available at NCBI. All freshwater fishes sampled by  
244 T.O., including *H. longirostris*, *N. temminckii*, *C. cuvieri* and *T. limbata*, are kept at Seikai  
245 National Fisheries Research Institute. Dr. Koichi Hoshino is responsible for the “Okazaki  
246 collection.”

247

## 248 **2.7. Code availability**

249 All analysis scripts can be found at  
250 [https://github.com/ShojiTaniguchi/Division\\_and\\_Isolation](https://github.com/ShojiTaniguchi/Division_and_Isolation).

251

## 252 **2.8 Ethical Statement**

253 The guidelines or policies on conducting animal experiment are stated in “Act on Welfare and  
254 Management of Animals” enacted in 1973 revised in 1999 and “Standards relating to the Care  
255 and Keeping and Reducing Pain of Laboratory Animals” (Notice of the Ministry of the  
256 Environment No. 88 of 2006). Most of the specimens used for the analysis were collected  
257 before 2000 while T.O. was working for National Research Institute of Aquaculture and  
258 National Research Institute of Fisheries Science, which also set up its guideline on animal  
259 experiment in 2008. However, fish is not subject to any of the above regulations or the  
260 guideline. Since there were no regulations or guidelines regarding the handling of fish body,  
261 the fish specimens were either immediately frozen or preserved in alcohol. The fish species  
262 we collected are commonly distributed and certainly not designated as nationally protected  
263 species or subject to any regulations.

264

## 265 **3. Results**

### 266 **3.1 Phylogeography of *H. longirostris***

267 ML mt tree for *H. longirostris* identified three monophyletic clades (I, II, III). All individuals  
268 in clades I and III were sampled in South Korea, while clade II included individuals from  
269 South Korea and Japan (Figure 3). Clade I is distributed in the central region of the Korean  
270 Peninsula, and Clade III is distributed in the southeastern region of Korea. The distribution of  
271 clade II includes two isolated areas across the Tsushima Strait—the southeast region of Korea,  
272 and western Japan, the latter distribution expanding from the Chugoku region facing the Seto  
273 Inland Sea (hereafter ‘Inland Sea’) to the western part of the Tokai region. Clade II originated  
274 in Korea, with a main migration event into Japan. This indicates the three clades diverged in  
275 Korea, with a clade splitting from the Korean population and migrating onto the Japanese  
276 archipelago via a land bridge.

277

278 Two land bridges between the continent and Japan are considered possible migration routes:  
279 the first between Korea and western Japan, and the second between the maritime province of  
280 Siberia and Hokkaido in Japan, through to Sakhalin in Russia (Figure 2b). The deep Tsugaru  
281 Strait between Honshu (the main island) and Hokkaido represented a dispersal barrier for  
282 freshwater fishes (Watanabe, 2012). Since their natural habitat does not extend to eastern and  
283 northern Japan, *H. longirostris* apparently used the land bridge to migrate from Korea to  
284 western Japan.

285

### 286 3.2. Phylogeography of *N. temminckii*

287 ML and Bayesian mt trees for *N. temminckii* consistently identified seven clades (A–G, Figure  
288 4a, B2a, B2b). Monophyly of clade F was significant in the Bayesian tree. All individuals in  
289 clades A, B, and D were sampled in South Korea, while clade C included individuals from  
290 South Korea and Japan (Figure 4b). The Korean population (C) is currently regarded as a  
291 distinct species, *N. koreanus* (Kim, Oh & Hosoya, 2005). Individuals in clade F were sampled  
292 in Japan, while those in clade G included individuals from both Japan and Korea. Clade F is  
293 distributed in the regions of Kinki, Chugoku, and Shikoku, whereas clade G is distributed in  
294 the regions of Chugoku, Shikoku, and Kyushu (Figure 4b). The distributions of the two clades  
295 appear to overlap in Chugoku and Shikoku, but fine-scale sampling in these regions reveals  
296 they are actually segregated (Figure 4c).

297  
298 The distribution of *N. temminckii* in clade C includes two largely separated geographical  
299 regions—the southeast region of the Korean Peninsula, and the Tokai region of Japan. Clades  
300 F and G occupied areas west of the Tokai region (Okazaki et al., 1991). Clade G is widely  
301 distributed throughout the southern region of Korea, and Kyushu, Chugoku, and Shikoku in  
302 Japan, whereas clade F is absent in Kyushu, but mostly present in Kinki (Figure 4b, 4c). A  
303 few samples of clade F were obtained in Tokai, at the upper reaches of the rivers running  
304 eastern side of Suzuka Mountains. Clade G expands around the Inland Sea, as does clade F,  
305 which is also found on the Sea of Japan side of Chugoku, and the Pacific Ocean side of  
306 Shikoku (Figure 4c), both isolated from the Inland Sea by mountains. In some areas, fishes in  
307 clade F occurred upstream or in mountain locations, while those in clade G occurred in the  
308 same river system in the mainstream or downstream (Figure 4d). The three clades originated  
309 in Korea, with three main migration events into Japan (Figure 4a). Clades C, F and G  
310 diverged in Korea, with some clades splitting from the Korean population and migrating onto  
311 the Japanese archipelago via a land bridge. For reasons similar to *H. longirostris*, *N.*  
312 *temminckii* apparently used the land bridge to migrate from Korea into western Japan.

313  
314 Since clade C inhabits the Tokai region, an area farthest from the land bridge in the Japanese  
315 distribution of *N. temminckii*, it represents the oldest clade in Japan (Figure 4b). Similarly,  
316 clade F is likely to be the second oldest clade, as it is distributed in the area second farthest  
317 from the land bridge. Clade G represents the youngest clade, as its distribution throughout  
318 Japan and Korea is closest. The existence of the Fossa Magna east of Tokai and Hokuriku  
319 (Figure 2b) might explain why *N. temminckii* did not expand further east. In glacial periods  
320 two paleo-river systems in the Inland Sea (Figure 4c) enabled gene flow (Watanabe et al.,  
321 2017). Therefore, the current Inland Sea was a likely dispersal route. The consecutive  
322 migration of clades C, F and G, followed by their dispersal might explain the present  
323 distribution of this species in Japan. Estimated divergence times are consistent with this  
324 scenario. As shown in Figure B3, node 1 (the split of clade C between Korea and Japan) is  
325 older than node 2 (the period of migration of clade F), with a posterior probability of 83.8%.  
326 Additionally, node 1 is older than node 3 (the period of migration of clade F from Korea),  
327 with a posterior probability of 98.2%. Although the phylogenetic tree does not provide a  
328 decisive chronology of nodal migration, the distribution map clearly suggests node 1 is older  
329 (Figure 4b). Bayesian tree estimation (Figure B2b) reveals that migration of clade C occurred  
330 1.52 Ma [0.876–2.04], clade F 1.31 Ma [0.896–1.74], and clade G 1.12 Ma [0.713–1.43].  
331 Therefore, we assume that the split in clade C between Korea and Japan occurred first, with  
332 clade F and G diverging from a common ancestor.

### 334 3.3 Significance of intra-species replacement



335 The *N. temminckii* clades F and G are similar, with average nucleotide distances of 1.78%, far  
336 lower than genetic distances among salmonid species (Thomas & Beckenbach, 1989). The  
337 taxonomic status of clade C is confusing; its population in Japan is regarded as the same  
338 species as clades F and G, while the population in Korea is considered to represent *T.*  
339 *koreensis*. The divided pattern of clade C is presumably at the intra-species level while the  
340 taxonomy requires review. Distributions of *N. temminckii* within Japan were simulated using  
341 various parameters (Figure 5a). The initial state was a universal distribution of clade C in  
342 western Japan. Clades F and G migrated into western Japan and expanded their distributions.  
343 Depending on replacement rate, resultant distributions differed (Figures 5b, 5c). To avoid  
344 effects of differing sampling effort, we considered dispersal of individuals on a lattice-like  
345 grid in Japan. Our model assumes dispersal distance follows a gamma distribution; it has four  
346 parameters:  $r$  (Ma) for the timing of migration of clade G,  $m$  for the dispersal rate (km/Kyr),  $s$   
347 (km) for the scale parameter of the gamma distribution, and  $\alpha$  for replacement rate. The  
348 timing of migration of clade F was set to 1.31 Ma, inferred using a Bayesian procedure  
349 (Figure B2b). Under this model,  $\alpha$  was estimated at 0.774 [0.554–0.951] (Figure B4), which  
350 is significantly higher than that for a neutral relationship (0.5). We therefore reject the null  
351 hypothesis of selective neutrality that assumes that the three clades C, F, and G have equal  
352 fitness. Of other parameters,  $m$  was extremely low, estimated at 0.345 [0.0135–0.860]  
353 km/Kyr, and  $s$  at 20.2 [5.33–40.1] km. The point estimates of  $m$  and  $s$  indicate that short  
354 dispersal was more frequent than long dispersal. The migration of clade G was dated at 0.862  
355 Ma [0.552–1.30]. The MCMCTREE gave a conditional credibility interval of 0.862 Ma  
356 [0.543–1.238].

357  
358 The estimated migration time of clade G is mostly consistent with the Bayesian time  
359 estimation under a relaxed clock. The Bayesian time estimation by BEAST dates the timing of  
360 migration of clade G as 1.120 Ma [0.713–1.430]. As the estimated timing of migration of  
361 clade F is 1.31 Ma, clade G migrated to Japan 1.013 Ma [0.696–1.263].

362  
363 Clade F is widely distributed in western Japan, but the distribution is isolated by Clade G in  
364 Chugoku and Shikoku. This pattern suggests that migration of clade G occurred after  
365 migration of clade F had settled into this habitat. Based on the fossil record, it is assumed that  
366 a land bridge between Kyushu and the continent of Asia formed at 0.43 Ma, 0.63 Ma, 1.2 Ma,  
367 and at about 5.3 Ma (Taruno, 2010). At the Last Glacial Maximum, sea-level was about 120 m  
368 lower than present (Rohling et al., 1998). Since the current minimum water depth between  
369 Korea and Kyushu is 130 m, the glacial periods were not necessarily accompanied by land-  
370 bridge formation. Furthermore, not all migration events contributed to the endemism of  
371 Japanese land mammals (Sato, 2017). While the migration of clade F and subsequent  
372 migration of clade G occurred in the Pleistocene, the exact timing of migration remains  
373 unresolved.

### 374 375 **3.4. *T. limbata* and related species, and *C. spp.* and *C. cuvieri*.**

376 Three clades (1, 3, and 4) of *T. limbata* were consistently identified in western Japan (Figure  
377 6a). Sister clades (5–7) occurred in Korea, where they were classified as one of *T. koreensis*,  
378 *T. latimarginata* Kim, Jeon & Suk, 2014 or Korean bittering *T. signifer* (Berg, 1907). Clade 2  
379 includes *T. limbata* from a mountainous location of Japanese Chugoku, and *T. somjinensis*  
380 from the upper reaches of the Korean Seomjin River. The fact that clades 1–4 are  
381 monophyletic, and the distribution of *T. somjinensis* is restricted to the upper Seomjin River  
382 where it is surrounded by *T. koreensis* and *T. latimarginata* (Jeon et al., 2018), suggests the *T.*  
383 *limbata* lineage formerly had a continuous distribution from Korea to Japan, but that this has  
384 since been divided by *T. koreensis* and *T. latimarginata*. The divided distributions of clade 2

385 also imply its past continuous range from Korea to Chugoku in Japan, with clades 3 and 4  
386 occurring in between.

387  
388 *Carassius cuvieri* is endemic to Lake Biwa, Japan, and is represented by clade b in Figure 6b.  
389 Since *C. cuvieri* was artificially transplanted to various places in Korea and Japan, the same  
390 sequences as the original population in Lake Biwa were found in Korea. However, in the  
391 Korean region of Haepyeong we detected another sequence, which we presume is indigenous  
392 unless the same sequence occurs in Lake Biwa; the fish differs morphologically and had  
393 initially been identified as an individual from Korean clades. As transplanted *C. cuvieri* are  
394 morphologically indiscernible from *C. cuvieri*, it is unlikely that these Haepyeong individuals  
395 were transplanted. It is possible that clade b was previously continuously distributed in  
396 western Japan and Korea and that it has since become isolated by other clades in Korea.

397  
398  
399

#### 4. Discussion

400 The Japanese freshwater fish populations we examined were derived from one or few clades  
401 of Korean populations. Other vertebrates in Japan such as the Siberian weasel *Mustela itatsi*  
402 Pallas, 1773 and the Japanese tree frog *Hyla japonica* (Günther, 1859) derived from one of a  
403 few clades of the continent as well. These phenomena suggest that the geographical origin of  
404 Japanese taxa is from Korea, and the migration waves out of Korea should be key factors in  
405 their distribution patterns if the Japanese taxa have related ones in Korea. The effects of  
406 migration might differ among taxa. In the case of *H. longirostris*, migration occurred only  
407 once, and the homogeneous genetic structure of this species in Japan indicates that dispersal  
408 occurred over a short period of time. The distribution of *H. longirostris* expands around the  
409 Inland Sea. To the contrary, *N. temminckii* migrated into Japan several times, probably  
410 resulting in the spatial structure of clades in Japan. The intermittent formation of the land  
411 bridge and stochastic success of migration through the land bridge generated taxon-specific  
412 waves into Japanese archipelago.

413

414 Genetic data from samples of multiple freshwater fishes from the Korean Peninsula and  
415 Japanese archipelago suggests waves of migrations of species from Korea have established  
416 themselves in Japan. Previous studies have interpreted the genetic structure of Japanese  
417 freshwater fish to have been caused mainly by vicariance. For example, the uplift of Suzuka  
418 and Nunobiki Mountains in the early Pleistocene (Figure 4c; Biwako Shizenshi Kenkyukai,  
419 1994) caused genetic differences in fishes between the Tokai and Kinki regions (Tomimaga et  
420 al., 2020). However, by incorporating phylogeographic data from Korea, we demonstrate that  
421 genetic differences in *N. temminckii* across Suzuka and Nunobiki Mountains are derived from  
422 different migration events from Korea, with the divergence of the two clades dating to the  
423 Pliocene (6.15 Ma; Figure B2) being significantly older than the uplift of the mountains. We  
424 also found older clades to be discontinuously distributed, separated by newer migrants. Such  
425 distributions cannot be fully explained by processes of diffusion or vicariance (Ronquist and  
426 Sanmartín, 2011), which predict genetic differentiation among components of division (Figure  
427 1). If geographically divided individuals of older clades are genetically similar, their  
428 distribution was formerly continuous until recently because gene flow is extremely low in  
429 freshwater fishes. Extinction events and the expansion of distributions of other clades  
430 produced existing patterns.

431

432 Our hypothesis, that intra- and inter-species replacement has occurred in the process of  
433 successive migrations of taxa from Korea, explains the discontinuous distributions of  
434 freshwater fish taxa in Japan. The simulation suggests that the effects of replacements are  
435 significant compared to the null model of neutrality. In addition, divisions between clades  
436 exist in areas where dispersal barriers exist. For *N. temminckii*, the distribution boundaries  
437 occur around uplifted mountains (Suzuka and Nunobiki Mountains; Figure 4c) and the east-  
438 west axis of mountains in the Chugoku and Shikoku regions (Figure 4c, 4d). East of the  
439 Inland Sea, the uplifted Suzuka and Nunobiki Mountains presumably acted as barriers to  
440 dispersal for newer migrants, in addition to preventing replacement of an older clade (Clade  
441 C) in the Tokai region. A few samples of *H. longirostris* from the Tokai region probably exist  
442 because of artificial transplantation (Higuchi, 1980), as sequences from these individuals are  
443 identical with samples from the Kinki region. Therefore, the eastward dispersal of *H.*  
444 *longirostris* was stopped in the same way as it was for *N. temminckii*. The most recent migrant  
445 (clade G) had a continuous distribution around the Inland Sea, with an older clade (F) found  
446 in rivers discharging into the Sea of Japan, the Pacific Ocean, and in the upper parts of rivers  
447 flowing into the Inland Sea. Dispersal of the newer migrant probably caused replacement,  
448 with the old clade divided into an area where the former could not reach.  
449

450 The formation of refugia might also contribute to discontinuous distributions. Many terrestrial  
451 animals in Japan sought refugia during glacial periods by migrating south or to low-altitude  
452 areas, and expanded their distributions again during interglacial periods (Sato, 2017).  
453 However, dispersal opportunities between rivers for freshwater fishes are more limited; they  
454 can either overwinter in local springs (Power et al., 1999) or go extinct. Therefore, we  
455 postulate that the main factors contributing to the present-day distributions of Japanese  
456 freshwater fishes are not the distributions of climatic refugia, but divergence, dispersal  
457 (Kitagawa et al., 2003; Takehana et al., 2003), migration and replacements.  
458

459 The signature of replacements is also found in other freshwater fishes in Japan. For example,  
460 Japanese rice fish *Oryzias latipes* (Temminck & Schlegel, 1846) in western Japan has a  
461 divided distribution (Iguchi et al., 2018; Takehana et al., 2003), and the pike gudgeon  
462 *Pseudogobio esocinus* (Temminck & Schlegel, 1846) (Watanabe et al., 2017) and Japanese  
463 spined loach *Cobitis biwae* Jordan & Snyder, 1901 (Kitagawa et al., 2003) have older clades  
464 in eastern and parts of western Japan, and more recent clades in wide areas of western Japan.  
465 Our hypothesis may not be restricted to freshwater fishes, as the distributions of closely  
466 related moles, *Mogera wogura* (Temminck, 1842) and *M. imaizumii* (Kuroda, 1957), are also  
467 similar to that reported for *N. temminckii*, with *M. wogura* expanding from Korea to western  
468 Japan and *M. imaizumii* in eastern Japan and some isolated area in western Japan (Abe, 1995,  
469 2001; Figure B5). These distributions are parapatric, with the latter having been replaced by  
470 the former at the distribution boundary; replacement of *M. imaizumii* by *M. wogura* was  
471 considered a decisive factor in the formation process (Abe, 2010).  
472

473 An interesting problem is whether replacements are confined to mitochondrial genomes, or if  
474 they extended to nuclear genomes also. Allozyme analysis of *N. temminckii* *PEPA* nuclear  
475 locus revealed two-allele polymorphism at the upper portions of a few rivers located in the  
476 western Tokai region. In the Tokai region where clade C was fixed, the allozyme haplotype  
477 was fixed (\*120) except the above populations. In the Kinki region where clade F was fixed,  
478 the allele is fixed to another (\*100). The observed number of individuals by genotype are  
479 consistent with the Hardy-Weinberg equilibrium. The haplotypes of mitochondria and  
480 allozyme were not consistent, which means that the individuals over the boundary crossed  
481 randomly. They were probably caused by stream capture (Table A1 in Appendix A). Since

482 clades F and G are genetically much closer than clades C and F, they could also hybridize.  
483 This implies that replacements occurred through change in composition of admixture. In the  
484 case of rosy bitterling *Rhodeus ocellatus* (Kner, 1866), when a non-native subspecies from the  
485 continent of Asia (*R. o. ocellatus*) was introduced into a population of Japanese native  
486 freshwater *R. o. kurumeus*, the mitochondrial and nuclear DNA of the former was replaced by  
487 the latter through hybridization (Kawamura et al., 2001). According to Ohta (1972), the  
488 efficiency of selection is negatively correlated with population size. The Korean Peninsula is  
489 part of the continent of Asia, and continental populations might have experienced higher  
490 competition than Japanese ones, and accordingly have higher fitness. Since newer migrants  
491 might have experienced higher selection pressures on the continent for a longer time, they  
492 may have higher fitness than indigenous species, resulting in the older clade being replaced by  
493 the newer clade. Japanese giant salamanders *Andrias japonicus* (Temminck, 1836)  
494 (Nishikawa, 2017) and Japanese weasel *Mustela itatsi* Temminck, 1844 (Imaizumi, 1960) are  
495 being replaced by related species that have been artificially transplanted from Korea or the  
496 continent of Asia.  
497

498 Intra- and inter-species replacements have also occurred in Korea, where Korean *C. cuvieri* at  
499 Haepyeong occurred upstream of Nakdong River, surrounded by the sister clade, *C. auratus*.  
500 This pattern is similar to the Korean *T. somjinensis*, which comprises a monophyletic clade  
501 (Clade 2) with Japanese *T. limbata*, and inhabits the upstream waters of Seomjin River,  
502 surrounded by *T. koreensis* and *T. latimarginata*. Local distribution barriers such as waterfalls  
503 or flashy streams may have helped these isolated clades survive, or survival may be due to  
504 chance. In southwestern Korea, we sampled populations of *H. longirostris* (Clade II),  
505 comprising a monophyletic clade with the Japanese clade, which were geographically  
506 surrounded by other clades. In the case of *N. temminckii*, the clade from southwestern Korea  
507 (Clade C) also had a patchy distribution around this region. The Japanese tree frog *H.*  
508 *japonica* (Figure B6) and Siberian weasel *M. itatsi* (Shalabi et al., 2017; Figure B7a) have  
509 divided distributions of certain clades on Tsushima Island, a small island between Korea and  
510 Japan in the middle of the migration route, with populations in the middle of the Korean  
511 Peninsula or Russia comprising monophyletic clades with those on Tsushima. Other clades  
512 were sampled in between (e.g., southern Korea). In these two species, we expect that the latter  
513 clades replaced the former clades in Korea, but the latter could not migrate to Tsushima  
514 Island. Both *T. somjinensis* and *N. koreanus* are regarded as Korean endemic species, but they  
515 are components of monophyletic clades with different species in Japan. The taxonomy of  
516 these species requires review.

517

518 While both replacements and waves of migration out of Korea are essential factors in  
519 phylogeography, other factors need considering also. For example, *C. cuvieri* migrated into  
520 Japan in a single wave because its population is monophyletic. However, the distribution of  
521 this species is restricted to the freshwater system of Lake Biwa; as it prefers calm waters, the  
522 loss of paleo-river systems around the Inland Sea with rising sea level may have reduced  
523 suitable habitat. A similar pattern was detected for the freshwater fish three-lips *Opsariichthys*  
524 *uncirostris* (Temminck & Schlegel, 1846) and related species (Okazaki et al., 2002). The  
525 population of *T. limbata* in Japan was segregated into 4 clades. Among them, only single  
526 clade (clade 2) contained the Korean population. To better understand the phylogeographic  
527 structure, a more comprehensive model is necessary. We analyzed one mtDNA locus and one  
528 nuclear DNA locus. Genome data would provide more information to assist with  
529 understanding the history of these taxa in Korea and Japan. Nevertheless, our hypothetical  
530 process involving waves of migrations and replacements can be applied for other places and

531 for different taxa, such as the brown bear *Ursus arctos* (Hirata et al., 2013, 2014; Waits et al.,  
532 1998; Figure B7b) and divided distribution of the mountain hare *Lepus timidus* Linnaeus,  
533 1758 (Kinoshita et al., 2012) in Hokkaido. Chinese rice fish *Oryzias sinensis* Chen, Uwa &  
534 Chu, 1989 had a divided distribution in Korea, which might be replaced by a clade migrating  
535 from the Continent of Asia (Takehana et al., 2004; Figure B8). Although our findings owe  
536 much to the suitable geographical conditions of the Japanese archipelago and Korean  
537 Peninsula, waves of migrations and replacements may be more common and have more  
538 widely influenced the formation of biota than previously recognized.

539

## 540 **Acknowledgements**

541

542 We deeply thank Jeffrey L. Thorne for valuable comments and suggestions on analytical  
543 methods and Tomoaki Hori for technical advice in speeding up the simulation program. We  
544 also thank Steve O'Shea (PhD) from Edanz Group ([www.edanzediting.com/ac](http://www.edanzediting.com/ac)) for editing a  
545 draft of this manuscript. This study was supported by Grants-in-Aid for Scientific Research  
546 (B) 16H02788 and 19H04070 from the Japan Society for the Promotion of Science.

547

## 548 **Supporting information**

549 Additional supporting information may be found online at the end of this article.

550

## 551 **CRedit authorship contributions statement**

552 Shoji Taniguchi: Conceptualization, Methodology, Data Curation, Writing—Original Draft,  
553 Visualization.

554 Johanna Bertl: Methodology, Writing—Review & Editing.

555 Andreas Futschik: Conceptualization, Methodology, Writing—Review & Editing.

556 Hirohisa Kishino: Conceptualization, Methodology, Writing—Review & Editing, Project  
557 administration, Funding acquisition.

558 Toshio Okazaki: Conceptualization, Investigation, Resources, Data Curation, Writing—  
559 Review & Editing, Project administration.

560

## 561 **References**

562 Abe, H. (1995). Revision of the Asian moles of the genus *Mogera*. *Journal of the*  
563 *Mammalogical Society of Japan*, 20, 51–68.

564 Abe, H. (2001). Isolated relic populations and their keeping mechanisms in moles.  
565 *Mammalian Science*, 41, 35–52. (in Japanese)

566 Abe, H. (2010). The northeastern front in the distribution of *Mogera wogura* in the central  
567 Honshu, Japan in 2009, especially the past 50 years' change in Nagano Prefecture.  
568 *Mammalian Science*, 50, 55–66. (in Japanese)

569 Aeschbacher, S., Beaumont, M. A., & Futschik, A. (2012). A novel approach for choosing  
570 summary statistics in approximate Bayesian computation. *Genetics*, 192, 1027–1047.  
571 <https://doi.org/10.1534/genetics.112.143164>

572 Amante, C., & Eakins, B. W. (2009). *ETOPO1 1 Arc-Minute Global Relief Model:*  
573 *Procedures, Data Sources and Analysis*. US Department of Commerce, National  
574 Oceanic and Atmospheric Administration, National Environmental Satellite, Data, and  
575 Information Service, National Geophysical Data Center, Marine Geology and  
576 Geophysics Division Colorado.

577 Baba, A. K., Matsuda, T., Itaya, T., Wada, Y., Hori, N., Yokoyama, M., ... Otofujii, Y. I.

- 578 (2007). New age constraints on counter-clockwise rotation of NE Japan. *Geophysical*  
579 *Journal International*, 171(3), 1325–1341. <https://doi.org/10.1111/j.1365->  
580 246X.2007.03513.x
- 581 Beaumont, M. A., Zhang, W., & Balding, D. J. (2002). Approximate Bayesian computation in  
582 population genetics. *Genetics*, 162, 2025–2035.  
583 <https://www.genetics.org/content/162/4/2025>
- 584 Biwako Shizenshi Kenkyukai. (1994). *Natural history of Lake Biwa (Biwako no shizen-shi)*.  
585 Tokyo, Japan: Yasaka Shobo. (in Japanese)
- 586 Bouckaert, R., Heled, J., Kühnert, D., Vaughan, T., Wu, C. H., Xie, D., ... Drummond, A. J.  
587 (2014). BEAST 2: A software platform for Bayesian evolutionary analysis. *PLoS*  
588 *Computational Biology*, 10(4), 1–6. <https://doi.org/10.1371/journal.pcbi.1003537>
- 589 Drummond, A. J., Ho, S. Y. W., Phillips, M. J., & Rambaut, A. (2006). Relaxed  
590 phylogenetics and dating with confidence. *PLoS Biology*, 4, 699–710.  
591 <https://doi.org/10.1371/journal.pbio.0040088>
- 592 Fairbanks, R. G. (1989). A 17,000-year glacio-eustatic sea level record: influence of glacial  
593 melting rates on the Younger Dryas event and deep-ocean circulation. *Nature*,  
594 342(6250), 637–642. <https://doi.org/10.1038/342637a0>
- 595 Flint, R. F. (1971). *Glacial and Quaternary Geology*. New York, NY: Wiley.
- 596 Geospatial Information Authority of Japan. (2013). Elevation chart by color. Retrieved from  
597 <https://maps.gsi.go.jp/development/ichiran.html>
- 598 Gutiérrez, E. E., Boria, R. A., & Anderson, R. P. (2014). Can biotic interactions cause  
599 allopatry? Niche models, competition, and distributions of South American mouse  
600 opossums. *Ecography*, 37, 741–753. <https://doi.org/10.1111/ecog.00620>
- 601 Hellenthal, G., Busby, G. B. J., Band, G., Wilson, J. F., Capelli, C., Falush, D., & Myers, S.  
602 (2014). A genetic atlas of human admixture history. *Science*, 343, 743–751.  
603 <https://doi.org/10.1126/science.1243518>
- 604 Hirata, D., Mano, T., Abramov, A. V., Baryshnikov, G. F., Kosintsev, P. A., Vorobiev, A. A.,  
605 ... Masuda, R. (2013). Molecular phylogeography of the brown bear (*Ursus arctos*) in  
606 Northeastern Asia based on analyses of complete mitochondrial DNA sequences.  
607 *Molecular Biology and Evolution*, 30, 1644–1652.  
608 <https://doi.org/10.1093/molbev/mst077>
- 609 Higuchi, Y. (1980). Freshwater fishes of Mie Prefecture. *Bulletin of the Mie Prefectural*  
610 *Museum*, (2), 69–100. (in Japanese)
- 611 Hirata, D., Abramov, A. V., Baryshnikov, G. F., & Masuda, R. (2014). Mitochondrial DNA  
612 haplogrouping of the brown bear, *Ursus arctos* (Carnivora: Ursidae) in Asia, based on a  
613 newly developed APLP analysis. *Biological Journal of the Linnean Society*, 111, 627–  
614 635. <https://doi.org/10.1111/bij.12219>
- 615 Iguchi, Y., Nakao, R., Matsuda, M., Takata, K., & Kitagawa, T. (2018). Origin of the widely  
616 and discontinuously distributed mitochondrial genotypes of *Oryzias latipes*: introduced  
617 or native genotypes? *Ichthyological Research*, 66, 183–188.  
618 <https://doi.org/10.1007/s10228-018-0662-3>
- 619 Imaizumi, Y. (1960). *Coloured Illustrations of the Mammals of Japan*. Osaka, Japan:  
620 Hoikusha. (in Japanese)
- 621 Japan Association for Quaternary Research. (1987). *Japanese Quaternary Map (Nihon*  
622 *Daiyonki Chizu)*. Tokyo, Japan: University of Tokyo Press. (in Japanese)
- 623 Jeon, H., Anderson, D., Won, H., Lim, H., & Young, H. (2018). Taxonomic characterization  
624 of *Tanakia* species (Acheilognathidae) using DNA barcoding analyses. *Mitochondrial*  
625 *DNA Part A*, 29, 964–973. <https://doi.org/10.1080/24701394.2017.1398746>
- 626 Kawamura, K., Ueda, T., Arai, R., Nagata, Y., Saitoh, K., Ohtaka, H., & Kanoh, Y. (2001).  
627 Genetic Introgression by the Rose Bitterling, *Rhodeus ocellatus ocellatus*, into the

- 628 Japanese Rose Bitterling, *R. o. kurumeus* (Teleostei: Cyprinidae). *Zoological Science*,  
629 18, 1027–1039. <https://doi.org/10.2108/zsj.18.1027>
- 630 Kinoshita, G., Nunome, M., Han, S.-H., Hirakawa, H., & Suzuki, H. (2012). Ancient  
631 Colonization and Within-Island Vicariance Revealed by Mitochondrial DNA  
632 Phylogeography of the Mountain Hare (*Lepus timidus*) in Hokkaido, Japan. *Zoological*  
633 *Science*, 29, 776–785. <https://doi.org/10.2108/zsj.29.776>
- 634 Kitagawa, T., Watanabe, M., Kitagawa, E., Yoshioka, M., Kashiwagi, M., & Okazaki, T.  
635 (2003). Phylogeography and the maternal origin of the tetraploid form of the Japanese  
636 spined loach, *Cobitis biwae*, revealed by mitochondrial DNA analysis. *Ichthyological*  
637 *Research*, 50, 318–325. <https://doi.org/10.1007/s10228-003-0174-6>
- 638 Kumar, S., Stecher, G., & Tamura, K. (2016). MEGA7: Molecular Evolutionary Genetics  
639 Analysis Version 7.0 for Bigger Datasets. *Molecular Biology and Evolution*, 33, 1870–  
640 1874. <https://doi.org/10.1093/molbev/msw054>
- 641 Kuwashiro, I. (1959). Submarine Topography of Japanese Inland Sea Setonaikai.  
642 *Geographical Review of Japan*, 32, 24–35. <https://doi.org/10.4157/grj.32.24> (in  
643 Japanese)
- 644 Ministry of Land, Infrastructure, Transport and Tourism (2011). National Land Numerical  
645 Information Rivers Data. Retrieved from [http://nlftp.mlit.go.jp/ksj-](http://nlftp.mlit.go.jp/ksj-e/gml/datalist/KsjTmplt-W05.html)  
646 [e/gml/datalist/KsjTmplt-W05.html](http://nlftp.mlit.go.jp/ksj-e/gml/datalist/KsjTmplt-W05.html)
- 647 Nielsen, R. Akey, J. M., Jakobsson, M., Pritchard, J. K., Tishkoff, S., & Willerslev, E. (2017).  
648 Tracing the peopling of the world through genomics. *Nature*, 541, 302-310.  
649 <https://doi.org/10.1038/nature21347>
- 650 Nishikawa, K. (2017). Species Diversity of Japanese Amphibians: Recent Progress and Future  
651 Prospects of Systematic Studies. In *Species Diversity of Animals in Japan* (pp. 165–181).  
652 Tokyo, Japan: Springer.
- 653 Ohta, T. (1972). Population Size and Rate of Evolution. *Journal of Molecular Evolution*, 1,  
654 305–14. <https://doi.org/10.1007/BF01653959>
- 655 Okazaki, T., Jeon, S. R., & Kitagawa, T. (2002). Genetic differentiation of piscivorous chub  
656 (genus *Opsariichthys*) in Japan, Korea and Russia. *Zoological science*, 19(5), 601-610.  
657 <https://doi.org/10.2108/zsj.19.601>
- 658 Okazaki, T., Watanabe, M., Mizuguchi, K., & Hosoya, K. (1991). Genetic differentiation  
659 between two types of dark chub, *Zacco temmincki*, in Japan. *Japanese Journal of*  
660 *Ichthyology*, 38, 133-140.
- 661 Otofujii, Y. I. (1996). Large tectonic movement of the Japan Arc in late Cenozoic times  
662 inferred from paleomagnetism: Review and synthesis. *Island Arc*, 5(3), 229-249.  
663 <https://doi.org/10.1111/j.1440-1738.1996.tb00029.x>
- 664 Pagel, M. (1994). Detecting correlated evolution on phylogenies: a general method for the  
665 comparative analysis of discrete characters. *Proceedings of the Royal Society of London*,  
666 255, 37–45. <https://doi.org/10.1098/rsta.1892.0001>
- 667 Pante, E., & Simon-Bouhet, B. (2013). marmap: a package for importing, plotting and  
668 analyzing bathymetric and topographic data in R. *PLoS One*, 8, e73051.  
669 <https://doi.org/10.1371/journal.pone.0073051>
- 670 Pearson, R. G., & Dawson, T. P. (2003). Predicting the impacts of climate change on the  
671 distribution of species: are bioclimate envelope models useful? *Global Ecology and*  
672 *Biogeography*, 361–371. <https://doi.org/10.1109/CLOUD.2010.16>
- 673 Posada, D., Crandall, K. A., & Templeton, A. R. (2006). Nested clade analysis statistics.  
674 *Molecular Ecology Notes*, 6, 590–593. <https://doi.org/10.1111/j.1471-8286.2006.01368.x>
- 675 Power, G., Brown, R. S., & Imhof, J. G. (1999). Groundwater and fish - Insights from  
676 northern North America. *Hydrological Processes*, 13, 401–422.  
677 [https://doi.org/10.1002/\(SICI\)1099-1085\(19990228\)13:3<401::AID-HYP746>3.0.CO;2-](https://doi.org/10.1002/(SICI)1099-1085(19990228)13:3<401::AID-HYP746>3.0.CO;2-)

- 678 A
- 679 R Core Team. (2017). R: A Language and Environment for Statistical Computing. Vienna,  
680 Austria. Retrieved from <https://www.r-project.org>
- 681 Rohling, E. J., Fenton, M., Jorissen, F. J., Bertrand, P., Ganssen, G., & Caulet, J. P. (1998).  
682 Magnitudes of sea-level lowstands of the past 500,000 years. *Nature*, *394*, 162–165.  
683 <https://doi.org/10.1038/28134>
- 684 Ronquist, F., & Sanmartín, I. (2011). Phylogenetic Methods in Biogeography. *Annual Review*  
685 *of Ecology, Evolution, and Systematics*, *42*, 441–464. [https://doi.org/10.1146/annurev-](https://doi.org/10.1146/annurev-ecolsys-102209-144710)  
686 [ecolsys-102209-144710](https://doi.org/10.1146/annurev-ecolsys-102209-144710)
- 687 Sato, J. J. (2017). A review of the processes of mammalian faunal assembly in Japan: insights  
688 from molecular phylogenetics. In *Species Diversity of Animals in Japan* (pp. 49–116).  
689 Tokyo, Japan: Springer.
- 690 Shafer, A. B. A., Cullingham, C. I., Côté, S. D., & Coltman, D. W. (2010). Of glaciers and  
691 refugia: A decade of study sheds new light on the phylogeography of northwestern North  
692 America. *Molecular Ecology*, *19*, 4589–4621. [https://doi.org/10.1111/j.1365-](https://doi.org/10.1111/j.1365-294X.2010.04828.x)  
693 [294X.2010.04828.x](https://doi.org/10.1111/j.1365-294X.2010.04828.x)
- 694 Shalabi, M. A., Abramov, A. V., Kosintsev, P. A., Lin, L. K., Han, S. H., Watanabe, S., ...  
695 Masuda, R. (2017). Comparative phylogeography of the endemic Japanese weasel  
696 (*Mustela itatsi*) and the continental Siberian weasel (*Mustela sibirica*) revealed by  
697 complete mitochondrial genome sequences. *Biological Journal of the Linnean Society*,  
698 *120*(2), 333–348. <https://doi.org/10.1111/bij.12891>
- 699 Takehana, Y., Nagai, N., Matsuda, M., Tsuchiya, K., & Sakaizumi, M. (2003). Geographic  
700 variation and diversity of the cytochrome *b* gene in Japanese wild populations of  
701 medaka, *Oryzias latipes*. *Zoological Science*, *20*, 1279–1291.  
702 <https://doi.org/10.2108/zsj.20.1279>
- 703 Takehana, Y., Uchiyama, S., Matsuda, M., Jeon, S., & Sakaizumi, M. (2004). Geographic  
704 variation and diversity of the cytochrome *b* gene in wild populations of medaka (*Oryzias*  
705 *latipes*) from Korea and China. *Zoological Science*, *21*, 483–491.  
706 <https://doi.org/10.2108/zsj.21.483>
- 707 Taruno, H. (2010). The stages of land bridge formation between the Japanese Islands and the  
708 continent on the basis of faunal succession. *The Quaternary Research*, *49*, 309–314. (in  
709 Japanese)
- 710 Templeton, A. R. (2004). Statistical phylogeography: Methods of evaluating and minimizing  
711 inference errors. *Molecular Ecology*, *13*, 789–809. [https://doi.org/10.1046/j.1365-](https://doi.org/10.1046/j.1365-294X.2003.02041.x)  
712 [294X.2003.02041.x](https://doi.org/10.1046/j.1365-294X.2003.02041.x)
- 713 Templeton, A. R., Routman, E., & Phillips, C. A. (1995). Separating population structure  
714 from population history: A cladistic analysis of the geographical distribution of  
715 mitochondrial DNA haplotypes in the tiger salamander, *Ambystoma tigrinum*. *Genetics*,  
716 *140*, 767–782.
- 717 Thomas, W. K., & Beckenbach, A. T. (1989). Variation in salmonid mitochondrial DNA:  
718 Evolutionary constraints and mechanisms of substitution. *Journal of Molecular*  
719 *Evolution*, *29*(3), 233–245. <https://doi.org/10.1007/BF02100207>
- 720 Tominaga, K., Nagata, N., Kitamura, J. I., Watanabe, K., & Sota, T. (2020). Phylogeography  
721 of the bitterling *Tanakia lanceolata* (Teleostei: Cyprinidae) in Japan inferred from  
722 mitochondrial cytochrome *b* gene sequences. *Ichthyological Research*, *67*(1), 105–116.  
723 <https://doi.org/10.1007/s10228-019-00715-8>
- 724 Tominaga, K., Nakajima, J., & Watanabe, K. (2016). Cryptic divergence and phylogeography  
725 of the pike gudgeon *Pseudogobio esocinus* (Teleostei: Cyprinidae): a comprehensive  
726 case of freshwater phylogeography in Japan. *Ichthyological Research*, *63*, 79–93.  
727 <https://doi.org/10.1007/s10228-015-0478-3>



- 728 Waits, L., Talbot, S., Ward, R. H., & Shields, G. (1998). Mitochondrial DNA Phylogeography  
729 of the North American Brown Bear and Implications for Conservation. *Conservation*  
730 *Biology*, 12, 408–417. <https://doi.org/10.1111/j.1523-1739.1998.96351.x>
- 731 Watanabe, K. (2012). Faunal structure of Japanese freshwater fishes and its artificial  
732 disturbance. *Environmental Biology of Fishes*, 94, 533–547.  
733 <https://doi.org/10.1007/s10641-010-9601-5>
- 734 Watanabe, K., Tominaga, K., Nakajima, J., Kakioka, R., & Tabata, R. (2017). Japanese  
735 Freshwater Fishes: Biogeography and Cryptic Diversity. In *Species Diversity of Animals*  
736 *in Japan* (pp. 183–227). Tokyo, Japan: Springer.
- 737 Waters, J. M. (2011). Competitive exclusion: Phylogeography's 'elephant in the room'?  
738 *Molecular Ecology*, 20, 4388–4394. <https://doi.org/10.1111/j.1365-294X.2011.05286.x>
- 739 Wisz, M. S., Pottier, J., Kissling, W. D., Pellissier, L., Lenoir, J., Damgaard, C. F., ...  
740 Svenning, J. C. (2013). The role of biotic interactions in shaping distributions and  
741 realised assemblages of species: Implications for species distribution modelling.  
742 *Biological Reviews*, 88, 15–30. <https://doi.org/10.1111/j.1469-185X.2012.00235.x>
- 743 Yackulic, C. B. (2017). Competitive exclusion over broad spatial extents is a slow process:  
744 evidence and implications for species distribution modeling. *Ecography*, 40, 305–313.  
745 <https://doi.org/10.1111/ecog.02836>
- 746 Yang, Z. (2007). PAML 4: Phylogenetic analysis by maximum likelihood. *Molecular Biology*  
747 *and Evolution*, 24, 1586–1591. <https://doi.org/10.1093/molbev/msm088>
- 748 Yu, G., Smith, D. K., Zhu, H., Guan, Y., & Lam, T. T. Y. (2017). GGTREE: an R package for  
749 visualization and annotation of phylogenetic trees with their covariates and other  
750 associated data. *Methods in Ecology and Evolution*, 8, 28–36.  
751 <https://doi.org/10.1111/2041-210X.12628>
- 752 Zardoya, R., & Doadrio, I. (1999). Molecular evidence on the evolutionary and  
753 biogeographical patterns of European Cyprinids. *Journal of Molecular Evolution*, 49,  
754 227–237. <https://doi.org/10.1007/PL00006545>
- 755

756 **Conflict of interest**

757 Declarations of interest: none.

758

759

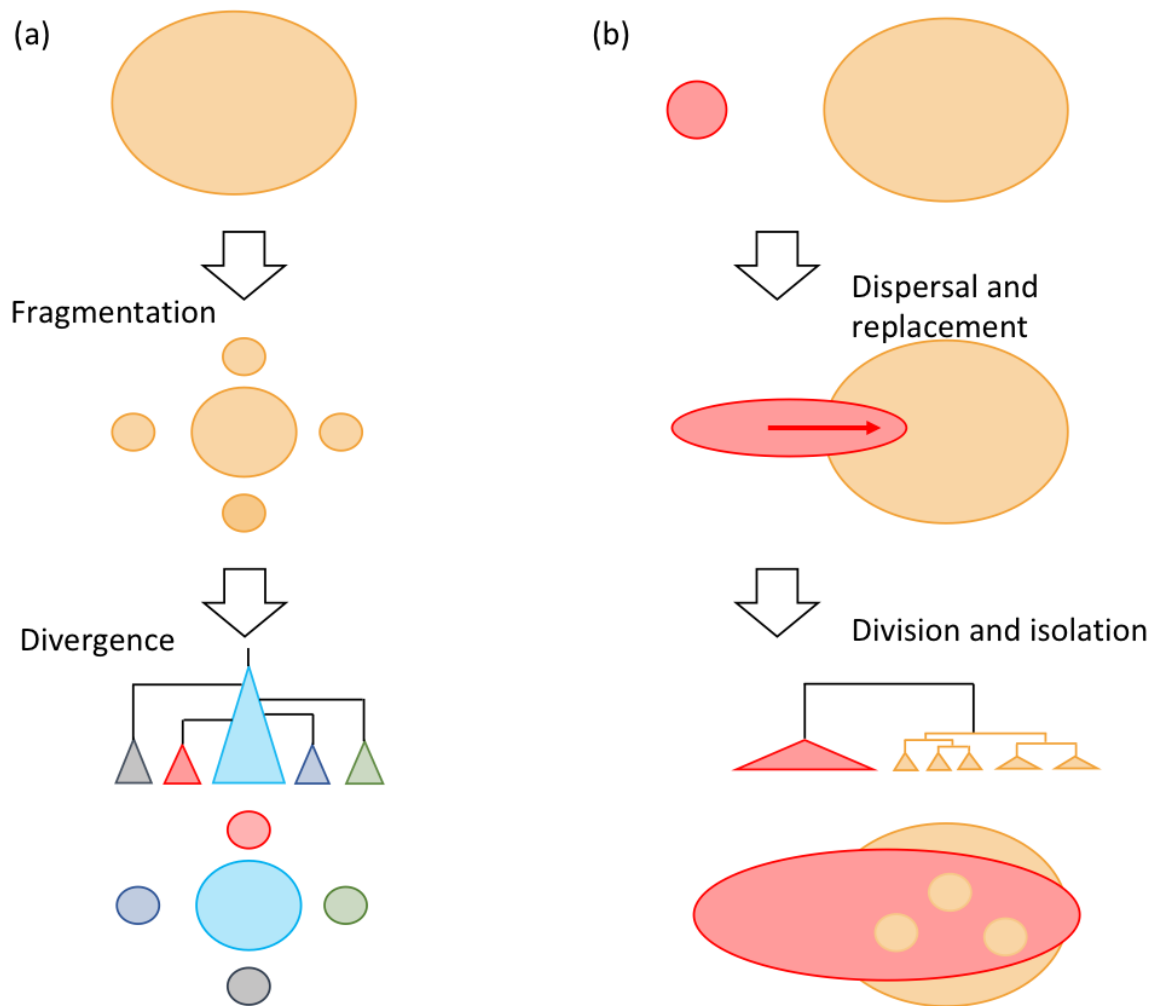

760  
761  
762  
763  
764  
765  
766  
767  
768  
769

**FIGURE 1**

Schematic illustration of conventional fragmentation and replacement. (a) conventional fragmentation, where fragmented populations diverge into small populations with unique genetic features. Isolated populations do not comprise monophyletic groups in the phylogeny, but are interspersed by the main population. (b) Local populations (three small circles and upper and lower fragments) recently divided by competitors from different clades are genetically homogeneous and comprise monophyletic groups.

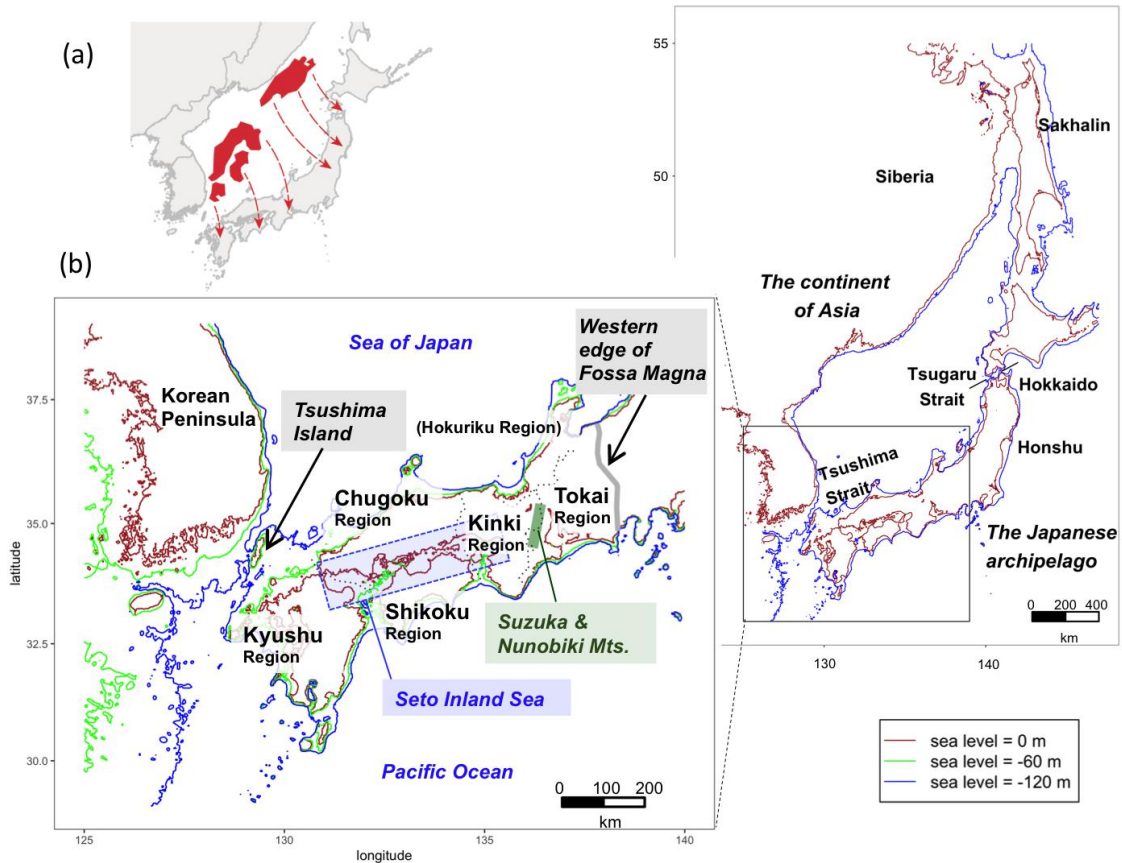

770  
771  
772  
773  
774  
775  
776  
777  
778  
779

## FIGURE 2

History of the Japanese Archipelago and study area. (a) Paleogeography of the Japanese archipelago inferred from geophysical information (Otofujii, 1996). (b) Study area map. An inferred map of the Far East during the last glacial period. The Seto Inland Sea, surrounded by Kyushu, Chugoku, Shikoku, and Kinki regions, with an average water depth of 38 m. Green and blue lines represent 60 m and 120 m bottom depths (Fairbanks, 1989; Rohling et al., 1998), respectively, and allow inferences to be made about coastal lines at times of lowered sea level.

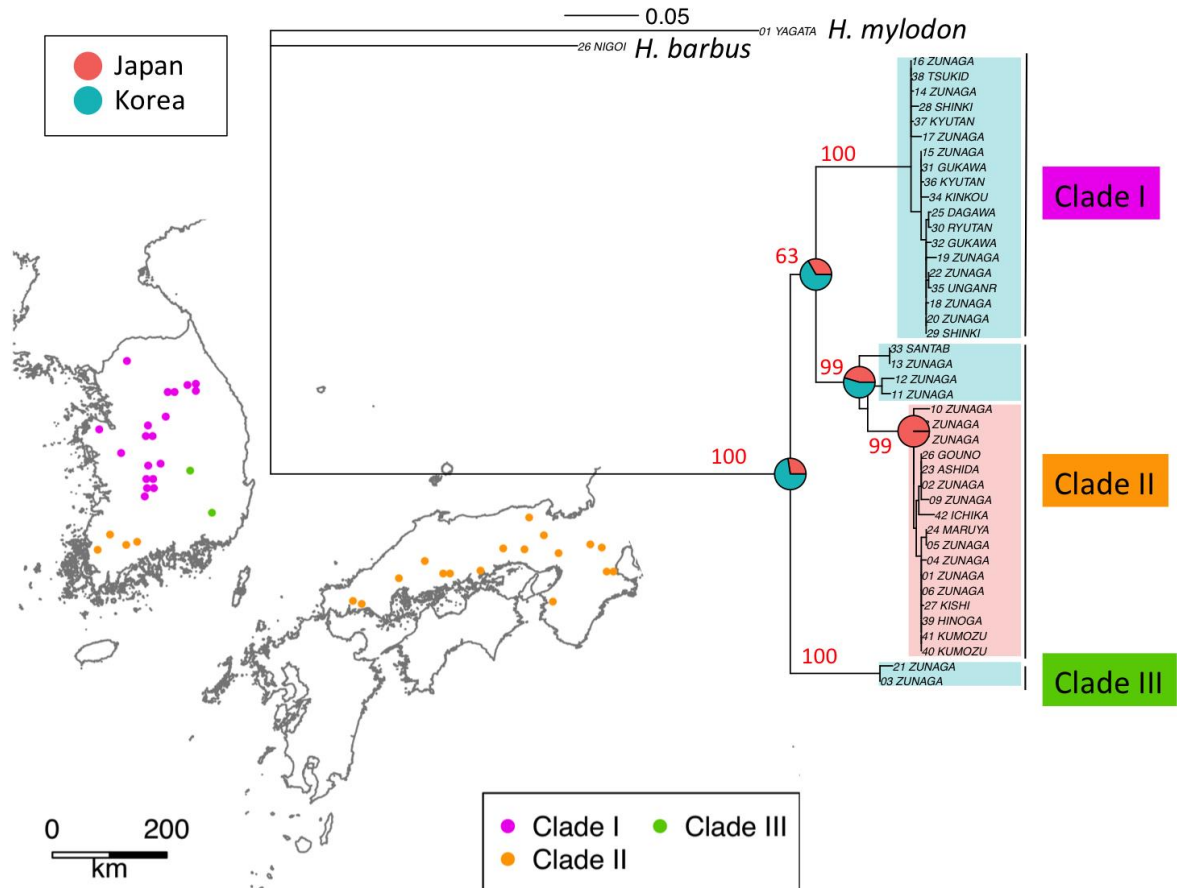

780  
781  
782  
783  
784  
785  
786  
787

**FIGURE 3**

Phylogenetic trees of ND2 sequences and geographic locations of *Hemibarbus longirostris* reconstructed from ND2 sequences. Red numbers in the phylogenetic tree indicate bootstrap probabilities (%). Pie charts on the phylogenetic tree represents the Bayesian assignment of ancestral nodes to Japan and Korea.

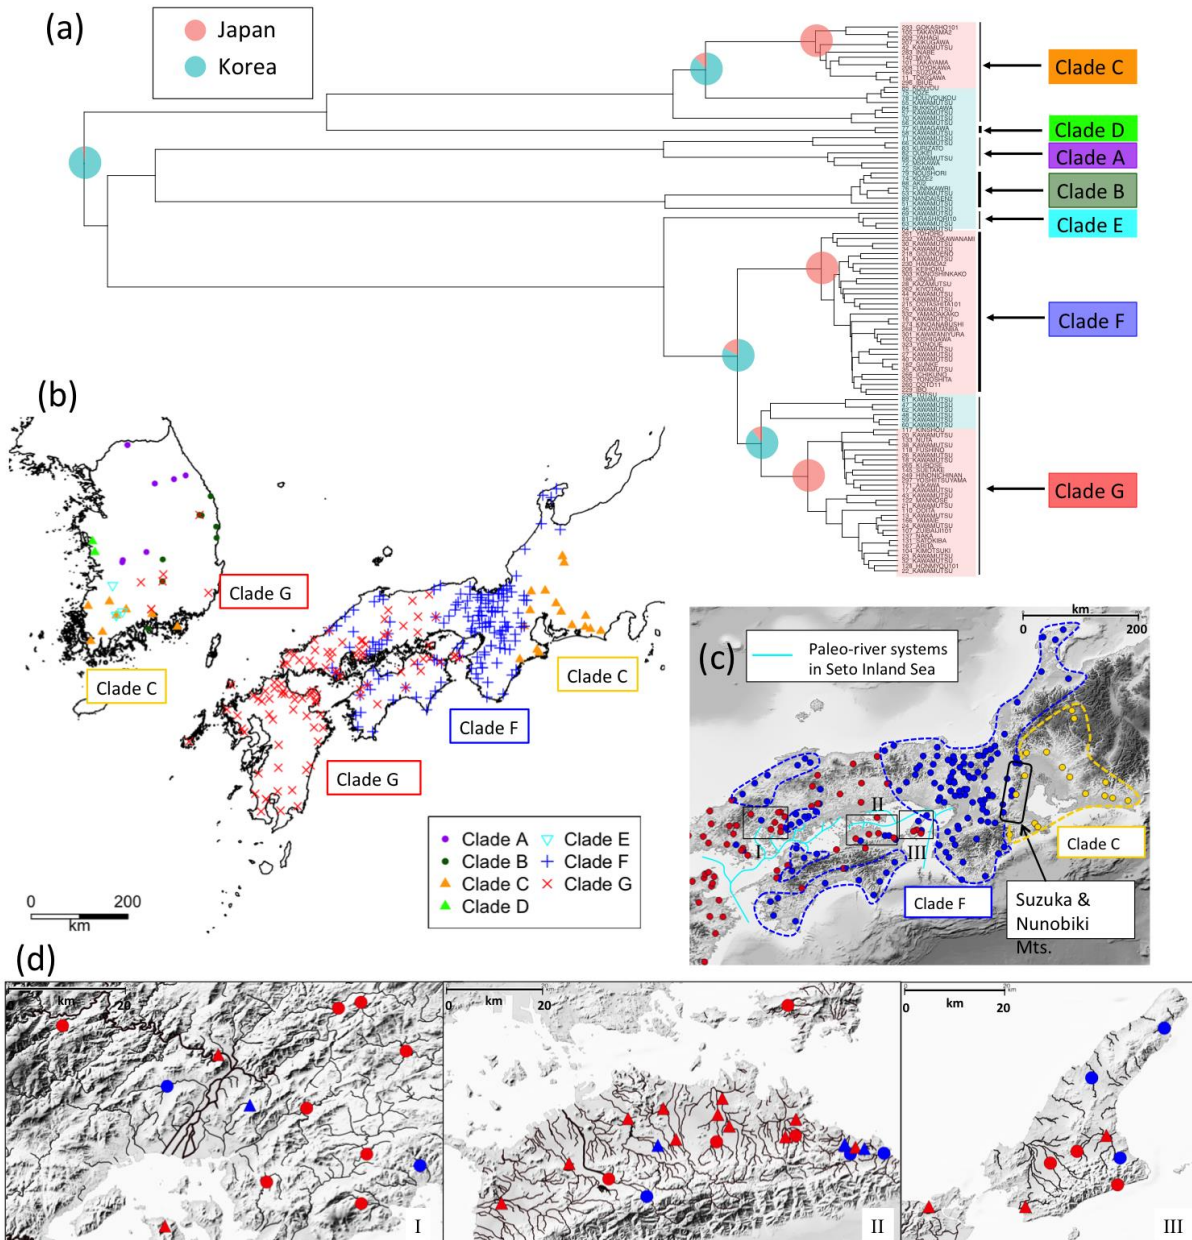

788  
789  
790  
791  
792  
793  
794  
795  
796  
797  
798  
799  
800  
801

#### FIGURE 4

Phylogeny and distribution of *Nipponocypris temminckii*. (a) Bayesian assignment of ancestral nodes to Japan and Korea; (b) sample sites by clade; (c) distribution of clades on shaded-relief map; and (d) focused distributions at sites I, II and III. Detailed distributions of individuals for which the type of a clade has been determined by PCR-RFLP analysis are displayed as triangular points (d). Colors represent the cleavage types of BstUI, DdeI, and TaqI that correspond to clades F and G (see supplementary information). Paleo-river systems (c) modified from original maps (Japan Association for Quaternary Research, 1987; Kuwashiro, 1959). At localities I and III, clade F was sampled at sites surrounded by mountains, but at locality II, clade F was sampled upstream and clade G downstream. We used R (R Core Team, 2017) package GGTREE (Yuet al., 2017) for visualization in (a).

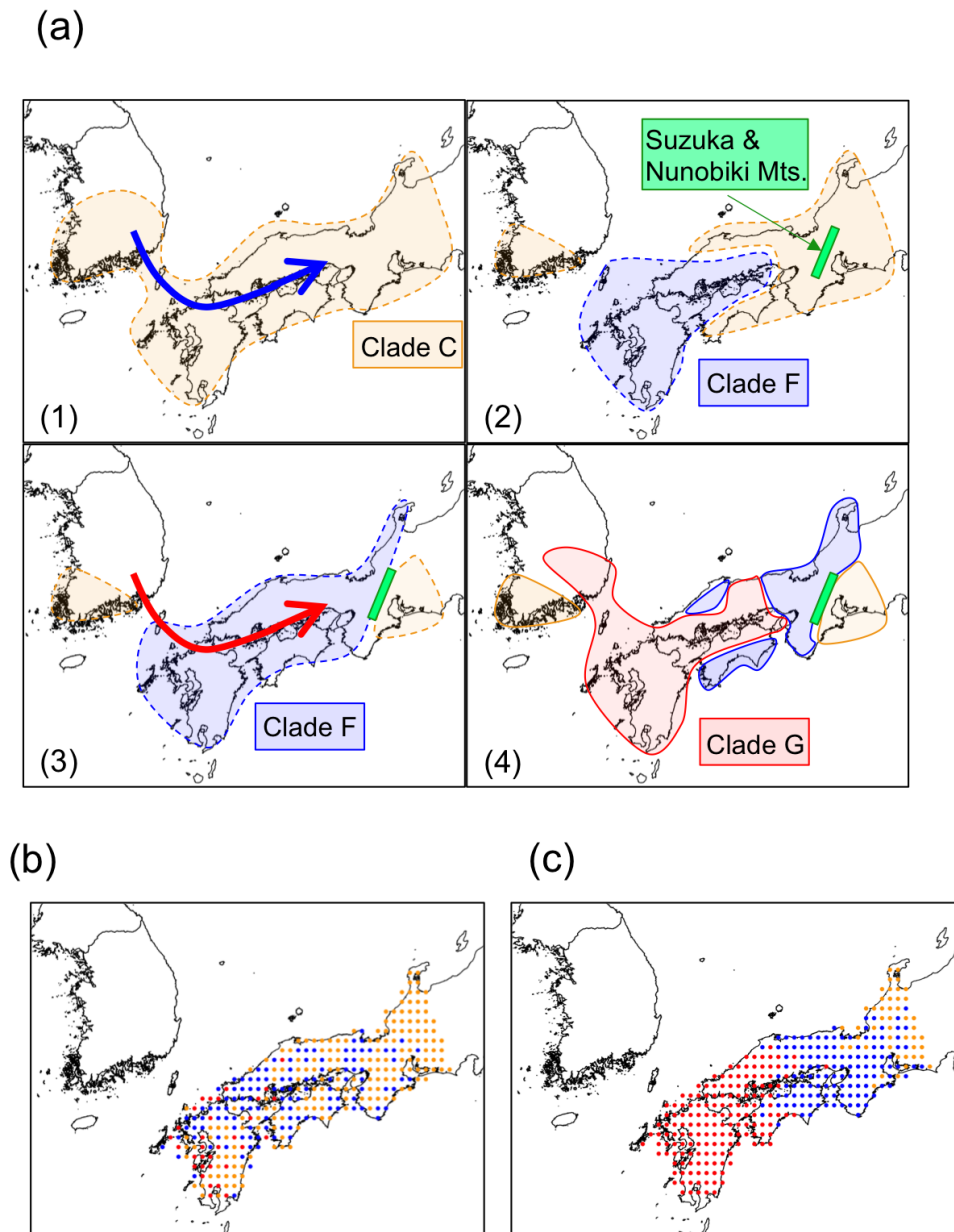

802  
803  
804  
805  
806  
807  
808  
809  
810  
811  
812  
813

## FIGURE 5

Schematic view and scenario of the formation process. (a) scenario with replacement for *Nipponocypris temminckii*: The number (1–4) at the bottom of each window represents the sequence in time and migration. The uplift of Suzuka and Nunobiki Mountains occurred in this process (2). (b) and (c) are examples of simulated *N. temminckii* distributions. (b) is the neutral scenario ( $m = 0.5$ ,  $s = 20.2$ ,  $\alpha = 0.5$ ,  $r = 0.853$ ), and (c) is the best scenario with replacements ( $m = 0.345$ ,  $s = 20.2$ ,  $\alpha = 0.774$ ,  $r = 0.853$ ). In the neutral scenario, the distribution of new migrants would expand where native populations had existed, and several clades would mix in a wide area.

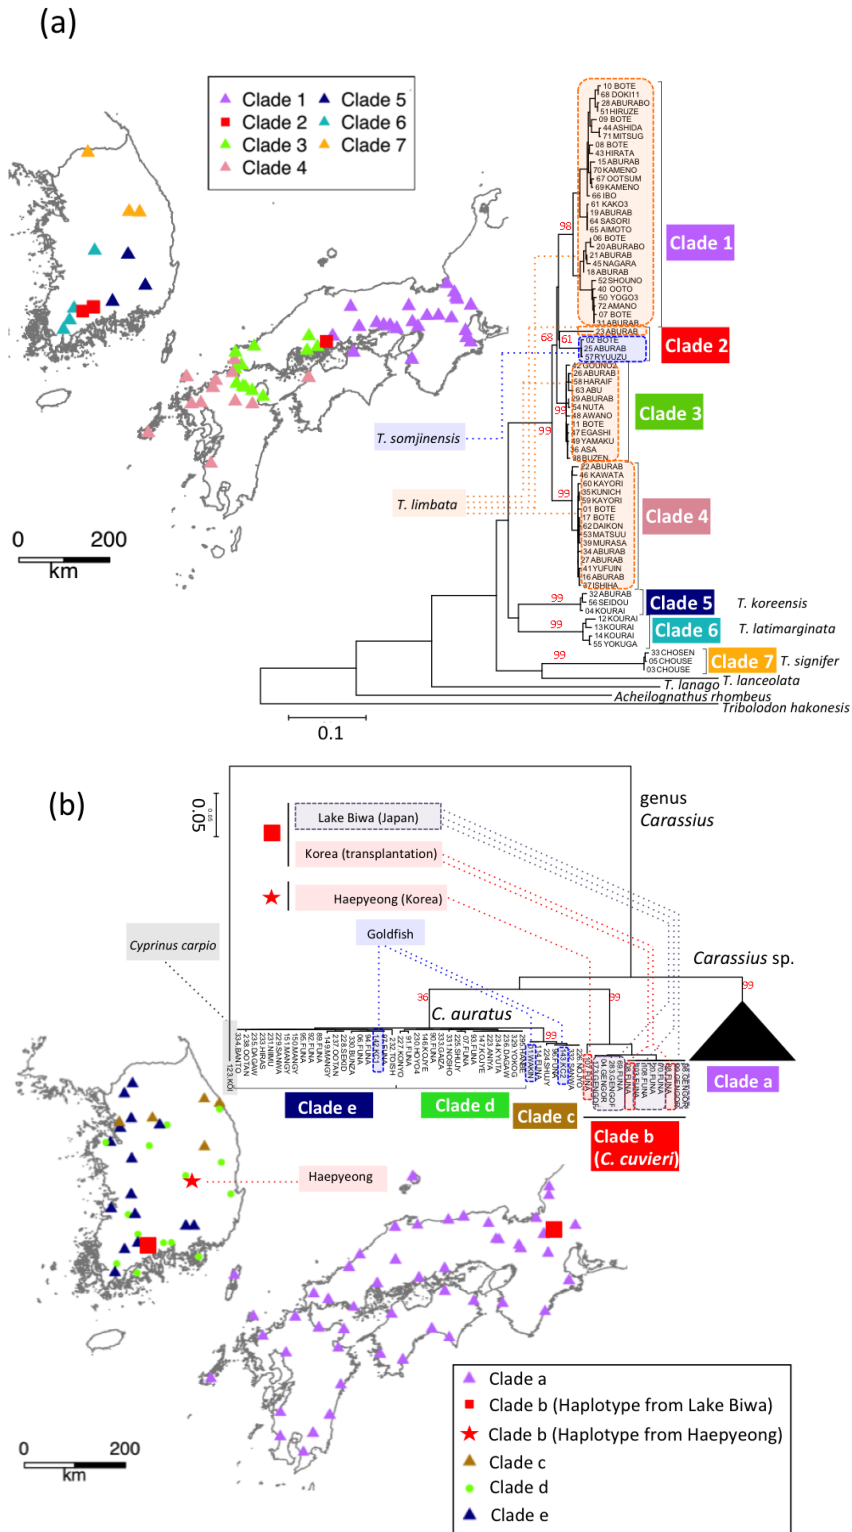

814

815

816

817

818

819

820

821

## FIGURE 6

Phylogenetic trees of ND2 sequences and geographic locations: (a) *Tanakia limbata* and related species, (b) *Carassius* spp. As for *Carassius cuvieri*, the haplotype from Lake Biwa was found at a southern site in Korea (red rectangle). The haplotype from Haepyeong (red star) was very close to the haplotypes from Lake Biwa, but differed morphologically (it was initially identified as an individual from Korean clades c, d, and e).
